# Supplementary material for: Using reconfigurable microfluidics to study the role of HGF in autocrine and paracrine signaling of hepatocytes
Source: Royal Society of Chemistry journal article supplement (doi:10.1039/c5ib00105f), 2015-01-01

## Supplementary Information

### Using Reconfigurable Microfluidics to Study the Role of Hepatocyte Growth Factor in Autocrine and Paracrine Signaling of Hepatocytes

Dipali Patel, Amranul Haque, Yandong Gao, Alexander Revzin

**Supplementary Figure 1.** Higher magnification brightfield images of recipient hepatocytes on day 5. (A) Recipient cells on collagen next to HGF spot without cells. (B) Recipient cells on collagen next to cells on col/HGF. Scale bar is 100  $\mu\text{m}$ .

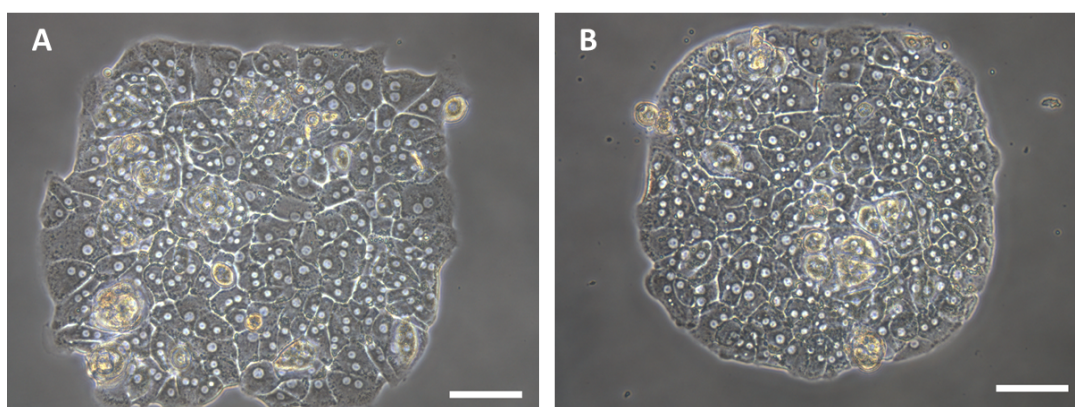

Supplement: c5ib00105f1.pdf [file c5ib00105f1.pdf]
